# Supplementary material
Source: PubMed Central journal article supplement (PMC298694)
Supplement: pnas_0337432100_6.pdf [file pnas_0337432100_6.pdf]

kcal/mol

120  
80  
40  
0  
-40  
-80  
-120

$\alpha$ Arg373

$\beta$ Gly156

$\beta$ Ala158

$\beta$ Gly159

$\beta$ Val160

$\beta$ Gly161

$\beta$ Lys162

$\beta$ Thr163

$\beta$ Val164

$\beta$ Glu188

$\beta$ Arg189

$\beta$ Glu192

$\beta$ Arg260

$\beta$ Tyr311

ATP  $\rightarrow$  ADP ( $\beta_{TP}$  site)

ATP  $\rightarrow$  ADP ( $\beta_{DP}$  site)

H<sub>2</sub>O  $\rightarrow$  Pi ( $\beta_{TP}$  site)

H<sub>2</sub>O  $\rightarrow$  Pi ( $\beta_{DP}$  site)
