# Supplementary material
Source: PubMed Central journal article supplement (PMC298694)

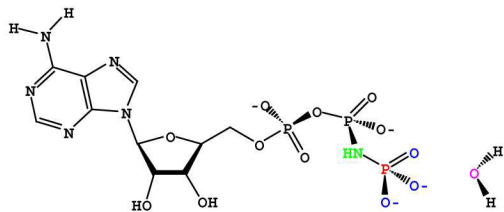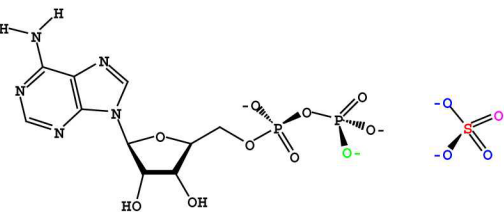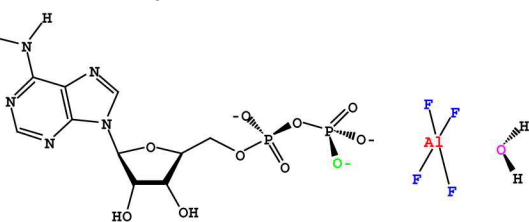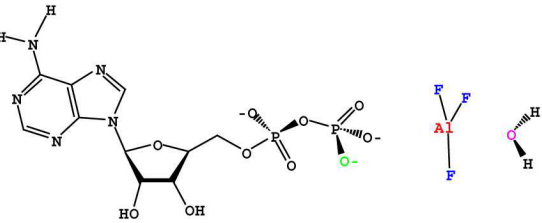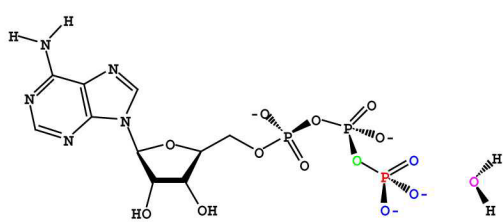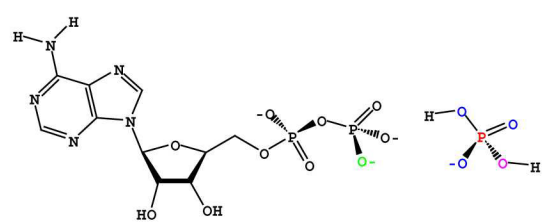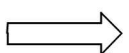

Supplement: pnas_0337432100_2.pdf [file pnas_0337432100_2.pdf]

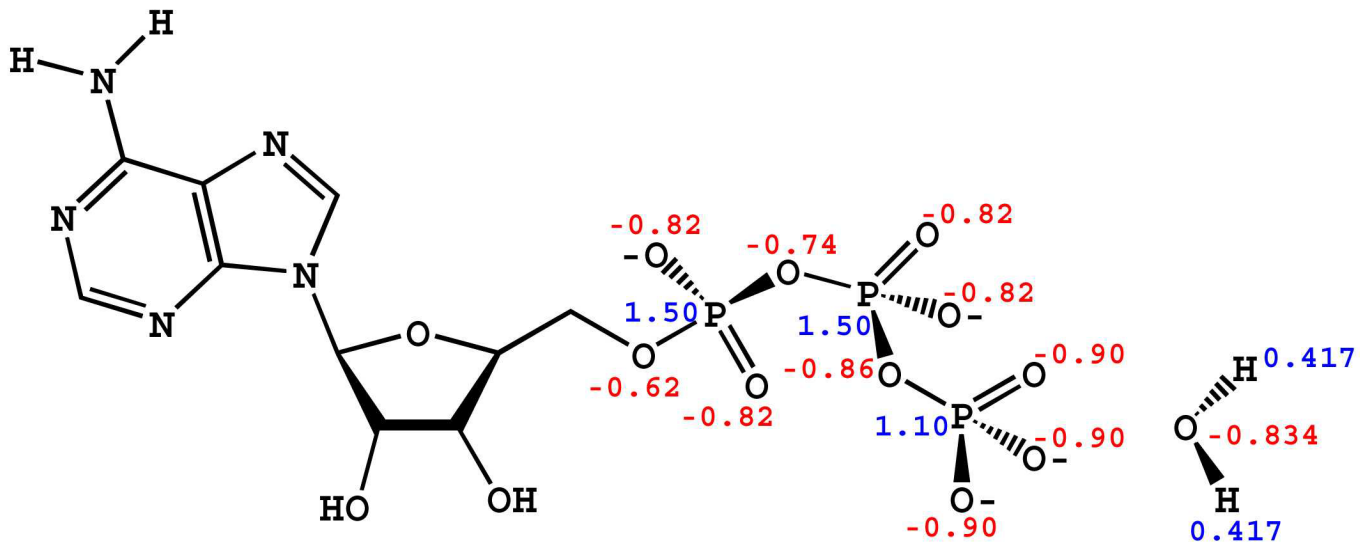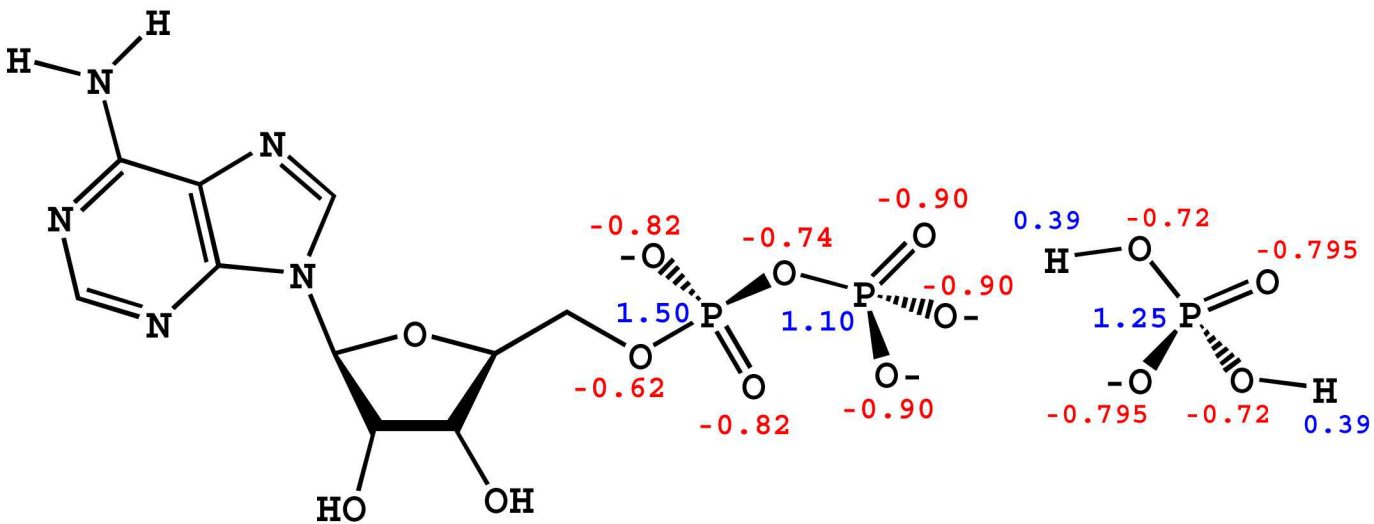

Supplement: pnas_0337432100_4.pdf [file pnas_0337432100_4.pdf]
